# Supplementary material
Source: ML conference proceedings conference paper supplement (https://openreview.net/forum?id=UGTbHjl3S95)
Supplement: supplementary_material [file attachment]

## A PROOF OF THEOREM 1

**Lemma 1** (McMahan & Streeter (2010)). *For any  $Q \in \mathcal{S}_+^d$  and convex feasible set  $\mathcal{F} \subset \mathbb{R}^d$ , suppose  $u_1 = \min_{x \in \mathcal{F}} \|Q^{1/2}(x - z_1)\|$  and  $u_2 = \min_{x \in \mathcal{F}} \|Q^{1/2}(x - z_2)\|$  then we have  $\|Q^{1/2}(u_1 - u_2)\| \leq \|Q^{1/2}(z_1 - z_2)\|$ .*

*Proof.* We provide the proof here for completeness. Since  $u_1 = \min_{x \in \mathcal{F}} \|Q^{1/2}(x - z_1)\|$  and  $u_2 = \min_{x \in \mathcal{F}} \|Q^{1/2}(x - z_2)\|$  and from the property of projection operator we have the following:

$$\langle z_1 - u_1, Q(z_2 - z_1) \rangle \geq 0 \text{ and } \langle z_2 - u_2, Q(z_1 - z_2) \rangle \geq 0.$$

Combining the above inequalities, we have

$$\langle u_2 - u_1, Q(z_2 - z_1) \rangle \geq \langle z_2 - z_1, Q(z_2 - z_1) \rangle. \quad (3)$$

Also, observe the following:

$$\langle u_2 - u_1, Q(z_2 - z_1) \rangle \leq \frac{1}{2} [\langle u_2 - u_1, Q(u_2 - u_1) \rangle + \langle z_2 - z_1, Q(z_2 - z_1) \rangle].$$

The above inequality can be obtained from the fact that

$$\langle (u_2 - u_1) - (z_2 - z_1), Q((u_2 - u_1) - (z_2 - z_1)) \rangle \geq 0 \text{ as } Q \in \mathcal{S}_+^d$$

and rearranging the terms. Combining the above inequality with Equation 3, we have the required result.  $\square$

*Proof.* For simplicity, vectors is also denoted in common lowercase in the proof. We begin with the following observation:

$$x_{t+1} = \Pi_{\mathcal{F}, \text{diag}(\eta_t^{-1})}(x_t - \eta_t \odot g_t) = \min_{x \in \mathcal{F}} \|\eta_t^{-1/2} \odot (x - (x_t - \eta_t \odot g_t))\|.$$

Furthermore, as  $\mathcal{F}$  is closed and convex, we can get  $x^* = \arg \min_{x \in \mathcal{F}} \sum_{t=1}^T f_t(x)$ . Using Lemma 1 with  $u_1 = x_{t+1}$  and  $u_2 = x^*$ , we have the following:

$$\begin{aligned} \|\eta_t^{-1/2} \odot (x_{t+1} - x^*)\|^2 &\leq \|\eta_t^{-1/2} \odot (x_t - \eta_t \odot g_t - x^*)\|^2 \\ &= \|\eta_t^{-1/2} \odot (x_t - x^*)\|^2 + \|\eta_t^{1/2} \odot g_t\|^2 - 2\langle g_t, x_t - x^* \rangle. \end{aligned}$$

Rearranging the above inequality, we have

$$\langle g_t, x_t - x^* \rangle \leq \frac{1}{2} \left[ \|\eta_t^{-1/2} \odot (x_t - x^*)\|^2 - \|\eta_t^{-1/2} \odot (x_{t+1} - x^*)\|^2 \right] + \frac{1}{2} \|\eta_t^{1/2} \odot g_t\|^2. \quad (4)$$

We now use the standard approach of bounding the regret at each step using convexity of the function  $f_t$  in the following manner:

$$\begin{aligned} \sum_{t=1}^T f_t(x_t) - f_t(x^*) &\leq \sum_{t=1}^T \langle g_t, x_t - x^* \rangle \\ &\leq \frac{1}{2} \sum_{t=1}^T \left[ \|\eta_t^{-1/2} \odot (x_t - x^*)\|^2 - \|\eta_t^{-1/2} \odot (x_{t+1} - x^*)\|^2 + \|\eta_t^{1/2} \odot g_t\|^2 \right] \\ &= \frac{1}{2} \left[ \sum_{t=2}^T \left[ \|\eta_t^{-1/2} \odot (x_t - x^*)\|^2 - \|\eta_{t-1}^{-1/2} \odot (x_t - x^*)\|^2 \right] \right. \\ &\quad \left. + \|\eta_1^{-1/2} \odot (x_1 - x^*)\|^2 - \|\eta_T^{-1/2} \odot (x_{T+1} - x^*)\|^2 + \sum_{t=1}^T \|\eta_t^{1/2} \odot g_t\|^2 \right] \\ &= \frac{1}{2} \left[ \sum_{t=2}^T \sum_{i=1}^d (x_{t,i} - x_i^*)^2 (\eta_{t,i}^{-1} - \eta_{t-1,i}^{-1}) + \sum_{i=1}^d \eta_{1,i}^{-1} (x_{1,i} - x_i^*)^2 \right. \\ &\quad \left. - \sum_{i=1}^d \eta_{T,i}^{-1} (x_{T+1,i} - x_i^*)^2 + \sum_{t=1}^T \sum_{i=1}^d g_{t,i}^2 \eta_{t,i} \right]. \end{aligned} \quad (5)$$

The first inequality is due to the convexity of functions  $\{f_t\}$ . The second inequality follows from the bound in Equation 4. For further bounding this inequality, we need the following intermediate result.

**Lemma 2.** *For the parameter settings and conditions assumed in Algorithm 1, we have*

$$\sum_{t=2}^T |\eta_{t,i}^{-1} - \eta_{t-1,i}^{-1}| \leq \frac{2}{\eta(1-\lambda)^3} \left[ (5-4\lambda)\sqrt{T} + 2\lambda - 1 \right].$$

*Proof.* For simplicity, we ignore subscript  $i$  in this lemma. Let  $\eta_{t+1} = \eta_t + \Delta t$ ,  $c_t = \frac{g_t m_t}{|g_t^i| \max(|m_t|) + \epsilon}$ ,  $b_t = \lambda^t c_t$  and  $a_t = \frac{1}{\sqrt{t}}$ , thus we have

$$\begin{aligned} \eta_t &= \frac{\eta}{\sqrt{t}}(1 + b_t), \\ \frac{\Delta t}{\eta} &= \frac{\eta_{t+1} - \eta_t}{\eta} = \frac{1}{\sqrt{t+1}}(1 + b_{t+1}) - \frac{1}{\sqrt{t}}(1 + b_t) \\ &= \left( \frac{1}{\sqrt{t+1}} - \frac{1}{\sqrt{t}} \right) + a_{t+1}b_{t+1} - a_t b_t \\ &= a_{t+1}(b_{t+1} - b_t) + (1 + b_t)(a_{t+1} - a_t). \end{aligned}$$

We observe that,

$$|a_{t+1}(b_{t+1} - b_t)| = \frac{|\lambda^{t+1}c_{t+1} - \lambda^t c_t|}{\sqrt{t+1}} \leq \frac{\lambda^{t+1}|c_{t+1}| + \lambda^t|c_t|}{\sqrt{t+1}} \leq \frac{2\lambda^t}{\sqrt{t}}.$$

Also, observe the following:

$$|(1 + b_t)(a_{t+1} - a_t)| \leq (1 + \lambda) \left( \frac{1}{\sqrt{t}} - \frac{1}{\sqrt{t+1}} \right) \leq \frac{2}{t\sqrt{t}}.$$

The above inequality can be obtained from the fact that  $|1 + b_t| \leq 1 + |b_t| \leq 1 + \lambda|c_t| \leq 1 + \lambda$ .

Hence, we have,

$$\frac{|\Delta t|}{\eta} \leq \frac{2}{\sqrt{t}} \left( \frac{1}{t} + \lambda^t \right)$$

By definition,

$$\eta \frac{1-\lambda}{\sqrt{t}} \leq \eta_t \leq \eta \frac{1+\lambda}{\sqrt{t}}$$

And then,

$$|\eta_{t+1}^{-1} - \eta_t^{-1}| = \left| \frac{\eta_{t+1} - \eta_t}{\eta_{t+1}\eta_t} \right| \leq \frac{|\Delta t|(t+1)}{\eta^2(1-\lambda)^2} \leq \frac{2(t+1)(\frac{1}{t} + \lambda^t)}{\sqrt{t}\eta(1-\lambda)^2}.$$

Finally, we have,

$$\begin{aligned} \sum_{t=2}^T |\eta_{t,i}^{-1} - \eta_{t-1,i}^{-1}| &\leq \frac{2}{\eta(1-\lambda)^2} \left[ \sum_{t=2}^T \frac{t}{t-1} \frac{1}{\sqrt{t-1}} + \sum_{t=2}^T \lambda^{t-1} \frac{t}{\sqrt{t-1}} \right] \\ &\leq \frac{2}{\eta(1-\lambda)^2} \left[ 2 \sum_{t=2}^T \frac{1}{\sqrt{t-1}} + \sum_{t=2}^T \lambda^{t-1} + \sum_{t=2}^T \lambda^{t-1} \sqrt{t-1} \right] \\ &\leq \frac{2}{\eta(1-\lambda)^3} \left[ (5-4\lambda)\sqrt{T} + 2\lambda - 1 \right]. \end{aligned}$$

The last inequality is due to the following upper bound:

$$\sum_{t=1}^T \frac{1}{\sqrt{t}} \leq 1 + \int_{t=1}^T \frac{dt}{\sqrt{t}} = 2\sqrt{T} - 1.$$

□

We now return to the proof of Theorem 1. Using the  $D_\infty$  bound on the feasible region and making use of the above property in Equation 5 and Lemma 2, we have

$$\begin{aligned}
& \sum_{t=1}^T f_t(x_t) - f_t(x^*) \\
& \leq \frac{1}{2} \left[ \sum_{t=2}^T \sum_{i=1}^d (x_{t,i} - x_i^*)^2 |\eta_{t,i}^{-1} - \eta_{t-1,i}^{-1}| + \sum_{i=1}^d \eta_{1,i}^{-1} (x_{1,i} - x_i^*)^2 + \sum_{t=1}^T \sum_{i=1}^d g_{t,i}^2 \eta_{t,i} \right] \\
& \leq \frac{D_\infty^2 d}{\eta(1-\lambda)^3} \left[ (5-4\lambda)\sqrt{T} + 2\lambda - 1 \right] + \frac{D_\infty^2 d}{2\eta(1-\lambda)} + G_2^2 d \eta (2\sqrt{T} - 1).
\end{aligned}$$

It is easy to see that the regret of AdaRem is upper bounded by  $O(\sqrt{T})$ .  $\square$

## B EXPERIMENT DETAILS

### B.1 HYPER-PARAMETERS GRID SEARCH

We run all experiments with cosine learning rate without a warmup stage and train for 100 epochs with a minibatch size of 1024 on 16 GPUs.

#### B.1.1 ADAPTIVE OPTIMIZERS' PERFORMANCE ON DEEP CONVOLUTIONAL NETWORK

We set the base learning rate of 0.4 for SGDM just as (He et al., 2019), AdaRem and AdaRem-S. For Adam, we set the base learning rate as 0.004, and choose the EMA parameter of the second momentum of gradient  $\beta_2$  from  $\{0.99, 0.999\}$ . For AdamW and AdaBound, we adopt the same hyper-parameters as Adam. For AdaBound, we choose the final\_lr from  $\{0.1, 0.4\}$ . For RMSProp, we choose the base learning rate from  $\{0.04, 0.004, 0.0004\}$ , and  $\beta_2$  from  $\{0.99, 0.999\}$ . The momentum parameter  $\beta$  of AdaRem is set as 0.999. Weight decay parameter is chosen from  $\{0.0001, 0.0003\}$  for all methods. Additional details can be seen in the Table 4.

Table 4: Hyper-parameters' setting of various optimization methods for ResNet18 on ImageNet. The bold number indicates the best one of the hyper-parameters to be selected and  $\epsilon$  is a term to improve numerical stability.  $\beta_1$  is the EMA parameter of the first momentum of gradient and  $\beta_2$  is the EMA parameter of the second momentum of gradient.

| Model    | Hyper-parameter            |                    |                     |                        |            |                 |
|----------|----------------------------|--------------------|---------------------|------------------------|------------|-----------------|
|          | lr                         | $\beta_1$          | $\beta_2$           | weight_decay           | $\epsilon$ | final_lr        |
| SGDM     | 0.4                        | <b>0.9</b> , 0.999 | $\sim$              | <b>0.0001</b> , 0.0003 | $\sim$     | $\sim$          |
| Adam     | 0.004                      | <b>0.9</b> , 0.999 | 0.99, <b>0.999</b>  | <b>0.0001</b> , 0.0003 | 1e-8       | $\sim$          |
| AdamW    | 0.004                      | <b>0.9</b> , 0.999 | 0.999               | <b>0.0001</b> , 0.0003 | 1e-8       | $\sim$          |
| AdaBound | 0.004                      | <b>0.9</b> , 0.999 | 0.999               | <b>0.0001</b> , 0.0003 | 1e-8       | <b>0.1, 0.4</b> |
| RMSProp  | 0.04, 0.004, <b>0.0004</b> | $\sim$             | <b>0.99</b> , 0.999 | <b>0.0001</b> , 0.0003 | 1e-8       | $\sim$          |
| AdaRem   | 0.4                        | 0.9, <b>0.999</b>  | $\sim$              | 0.0001, <b>0.0003</b>  | 1e-8       | $\sim$          |

#### B.1.2 ADAREM-S VS. SGDM ACROSS VARIOUS ARCHITECTURES

For AdaRem-S, we choose momentum parameter from  $\{0.995, 0.999\}$  of ResNet50, and the sphere radius from  $\{10, 100\}$  of MobileNetV2. MobileNetV2-0.5 and MobileNetV2-1.0 employ the same hyper-parameter's setting. Additional details can be seen in the Table 5.

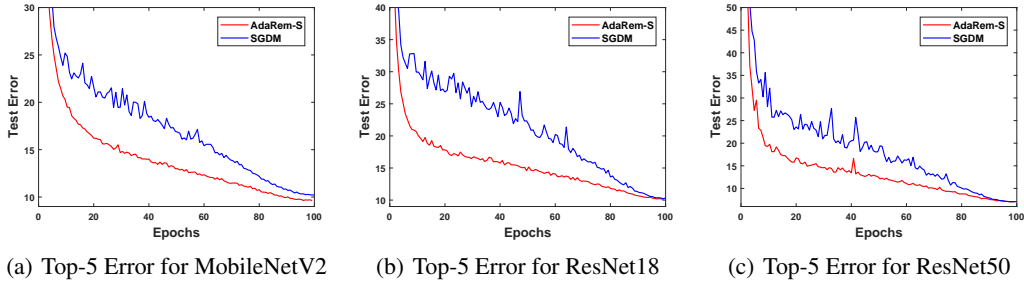

Figure 6: Top-5 error of three networks on ImageNet.

Table 5: Hyper-parameters’ setting of AdaRem-S and SGD for ResNet-18, ResNet-50 and MobileNetV2 on ImageNet. The bold number indicates the best one of the hyper-parameters to be selected.

| Model        | optimizer | Hyper-parameter |                      |                   |                |            |
|--------------|-----------|-----------------|----------------------|-------------------|----------------|------------|
|              |           | lr              | momentum             | weight_decay      | R              | $\epsilon$ |
| ResNet-18    | SGDM      | 0.4             | 0.9                  | 1e-4              | ~              | ~          |
|              | AdaRem-S  | 0.4             | 0.999                | 1e-4              | 10             | 1e-8       |
| ResNet-50    | SGDM      | 0.4             | 0.9                  | 1e-4              | ~              | ~          |
|              | AdaRem-S  | 0.4             | <b>0.995</b> , 0.999 | 1e-4              | 10             | 1e-8       |
| MobileNetV2  | SGDM      | 0.4             | 0.9                  | 1e-4, <b>4e-5</b> | ~              | ~          |
|              | AdaRem-S  | 0.4             | 0.999                | 1e-4, <b>4e-5</b> | <b>10, 100</b> | 1e-8       |
| ShuffleNetV2 | SGDM      | 0.4             | 0.9                  | 1e-4, <b>4e-5</b> | ~              | ~          |
|              | AdaRem-S  | 0.4             | 0.999                | 1e-4, <b>4e-5</b> | <b>10, 100</b> | 1e-8       |

## B.2 OTHER EXPERIMENTAL RESULTS

Table 6: Top-5 accuracy of various networks on the ImageNet dataset. The bold number indicates the best result.

| Model            | Top-5 Accuracy(%) |              |
|------------------|-------------------|--------------|
|                  | SGDM              | AdaRem-S     |
| ResNet50         | 92.9              | <b>92.92</b> |
| ResNet18         | 89.74             | <b>89.87</b> |
| MobileNetV2-1.0  | 89.81             | <b>90.34</b> |
| MobileNetV2-0.5  | 84.66             | <b>85.30</b> |
| ShuffleNetV2-1.0 | 87.68             | <b>87.96</b> |
| ShuffleNetV2-0.5 | 80.23             | <b>81.77</b> |

Table 7: Train loss of various networks on the ImageNet dataset. The bold number indicates the best result.

| Model            | Train Loss |              |
|------------------|------------|--------------|
|                  | SGDM       | AdaRem-S     |
| ResNet50         | 0.932      | <b>0.823</b> |
| ResNet18         | 1.331      | <b>1.148</b> |
| MobileNetV2-1.0  | 1.462      | <b>1.343</b> |
| MobileNetV2-0.5  | 1.965      | <b>1.887</b> |
| ShuffleNetV2-1.0 | 1.340      | <b>1.337</b> |
| ShuffleNetV2-0.5 | 1.839      | <b>1.744</b> |
